# Supplementary material for: Preparation of amino-substituted anthraquinone: study of the intersystem crossing and application as efficient photoinitiators for photopolymerization
Source: Royal Society of Chemistry journal article supplement (doi:10.1039/d3nj01330h), 2023-01-01
Supplement: d3nj01330h1.pdf [file d3nj01330h1.pdf]

Electronic Supplementary Information for:

## **Preparation of Amino-Substituted Anthraquinone: Study of the Intersystem Crossing and Application as Efficient Photoinitiators for Photopolymerization**

Ruilei Wang,<sup>a</sup> Huaiman Cao,<sup>a</sup> Jianzhang Zhao<sup>a\*</sup> and Fabiao Yu<sup>b\*</sup>

<sup>a</sup> State Key Laboratory of Fine Chemicals, Frontier Science Center for Smart Materials, School of Chemical Engineering, Dalian University of Technology, 2 Ling Gong Road, Dalian 116024, P. R. China. \*E-mail: zhaojzh@dlut.edu.cn (J.Z.)

<sup>b</sup> Key Laboratory of Hainan Trauma and Disaster Rescue, The First Affiliated Hospital of Hainan Medical University, Hainan Medical University, Haikou 571199, P. R. China \*E-mail: yufabiao@hainmc.edu.cn (F. Y.)

## Contents

|                                                                 |     |
|-----------------------------------------------------------------|-----|
| 1. NMR and HRMS Spectra.....                                    | S3  |
| 2. Steady State UV–Vis Absorption and Luminescence Spectra..... | S9  |
| 3. Photobleaching and photopolymerization.....                  | S12 |
| 4. DFT computation.....                                         | S17 |

# 1. NMR and HRMS Spectra

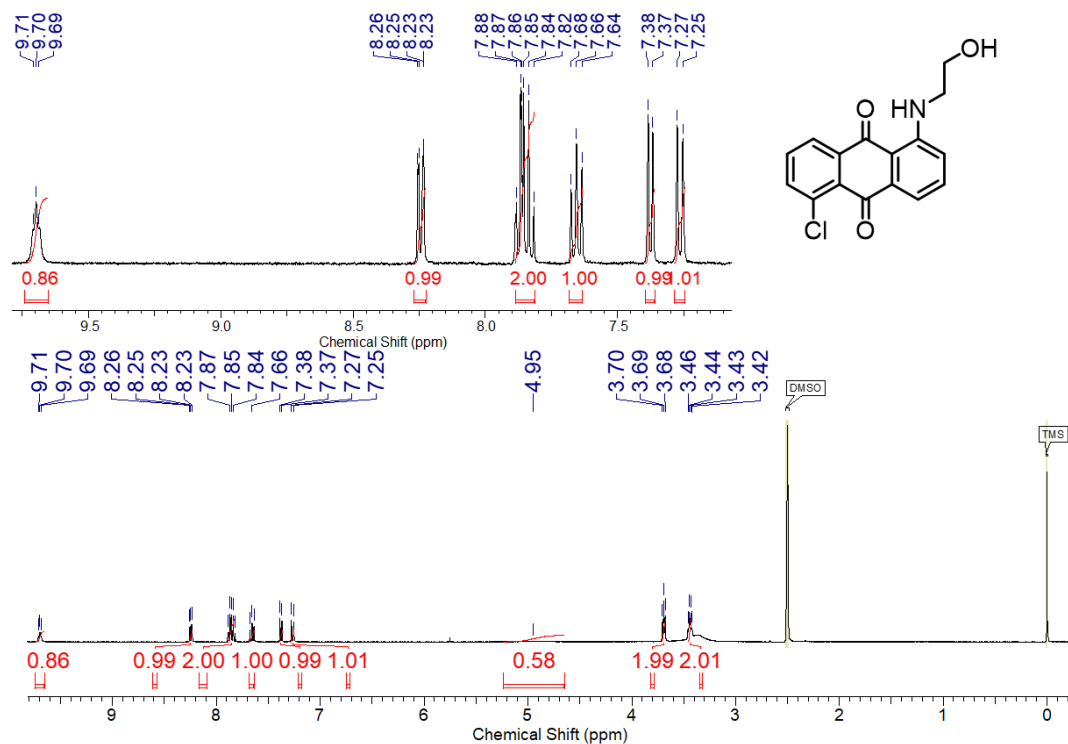

Figure S1. <sup>1</sup>H NMR spectrum of compound AQ-NH-OH-5-Cl (DMSO-d<sub>6</sub>, 400 MHz).

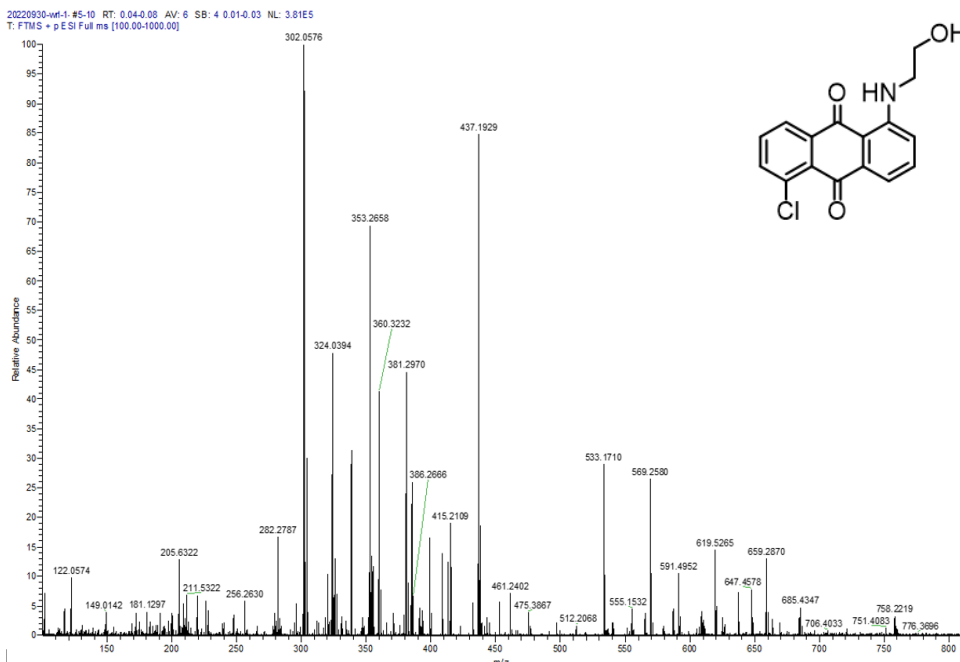

Figure S2. HRMS ESI<sup>+</sup> of compound AQ-NH-OH-5-Cl.

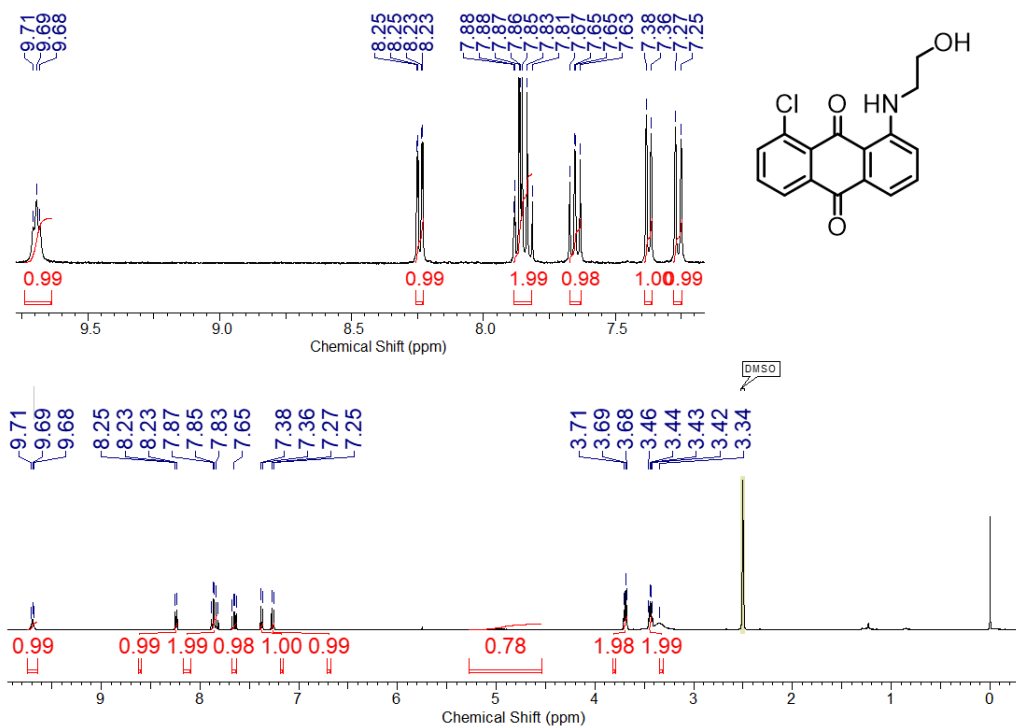

Figure S3. <sup>1</sup>H NMR spectrum of compound AQ-NH-OH-8-Cl (DMSO-*d*<sub>6</sub>, 400 MHz).

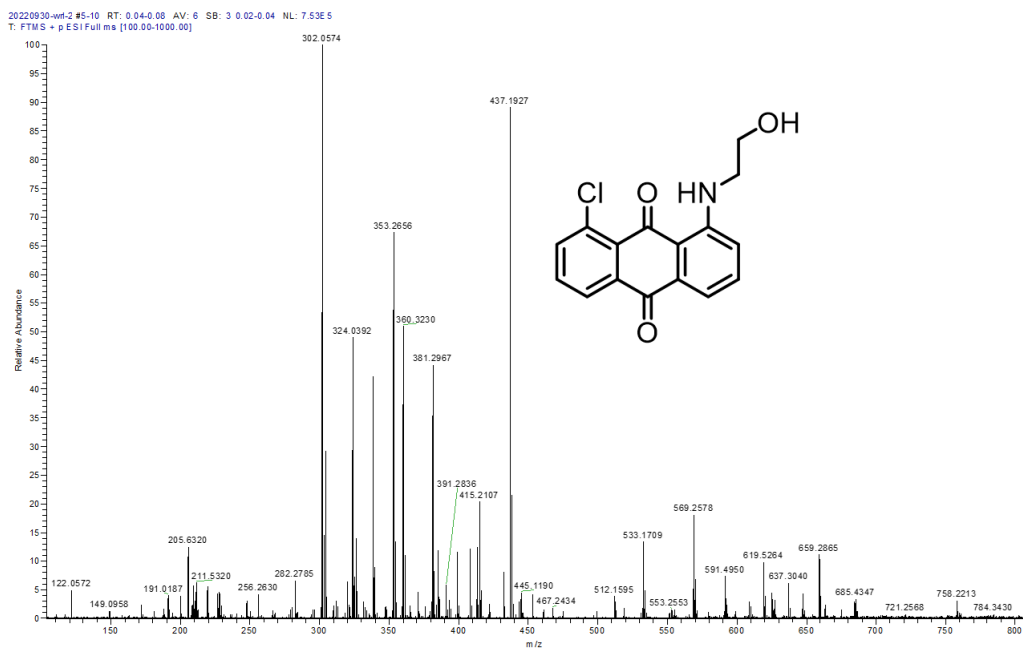

Figure S4. HRMS ESI<sup>+</sup> of compound AQ-NH-OH-8-Cl.

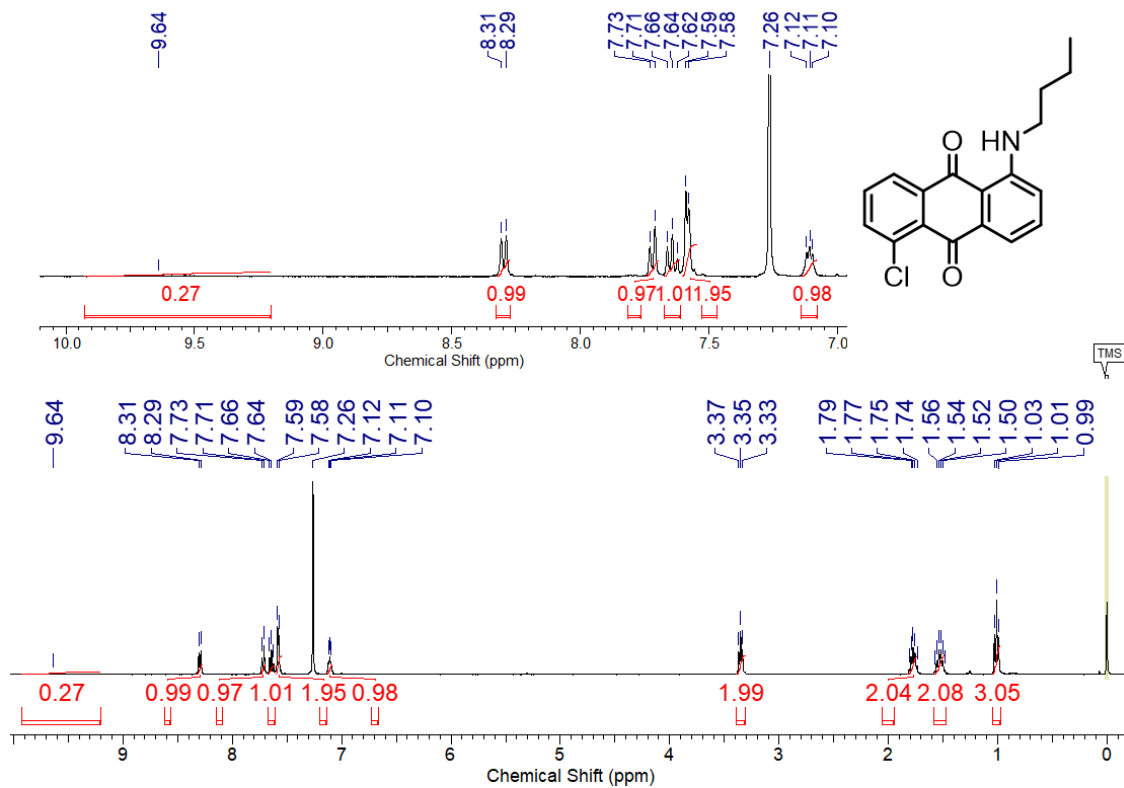

Figure S5.  $^1\text{H}$  NMR spectrum of compound AQ-NH-5-Cl ( $\text{CDCl}_3$ , 400 MHz).

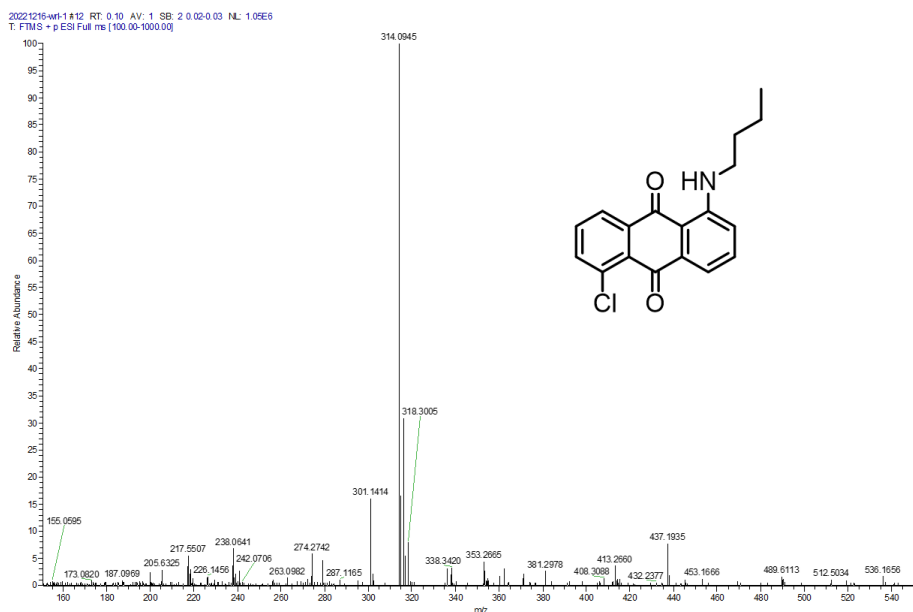

Figure S6. HRMS ESI $^+$  of compound AQ-NH-5-Cl.

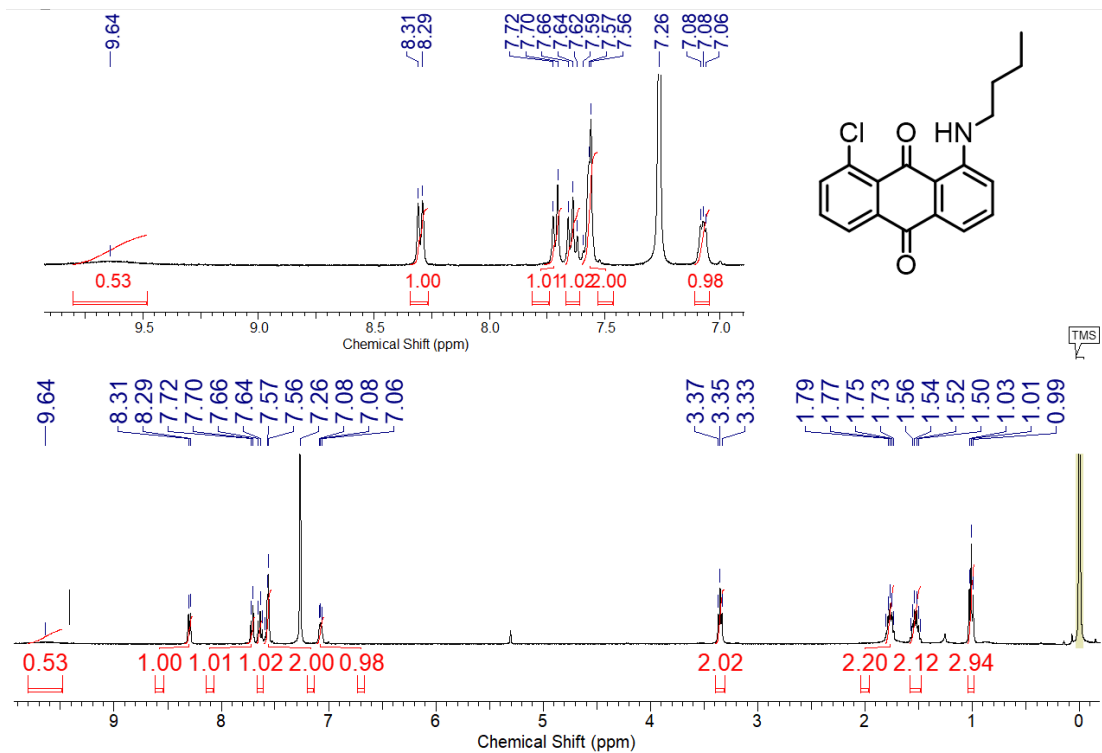

Figure S7.  $^1\text{H}$  NMR spectrum of compound **AQ-NH-8-Cl** ( $\text{CDCl}_3$ , 400 MHz).

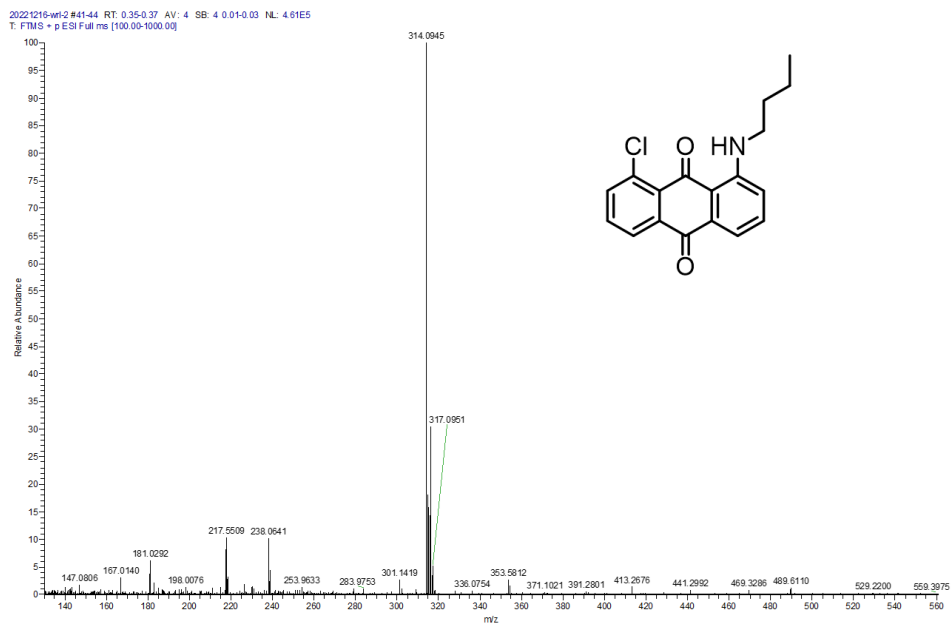

Figure S8. HRMS ESI $^+$  of compound **AQ-NH-8-Cl**.

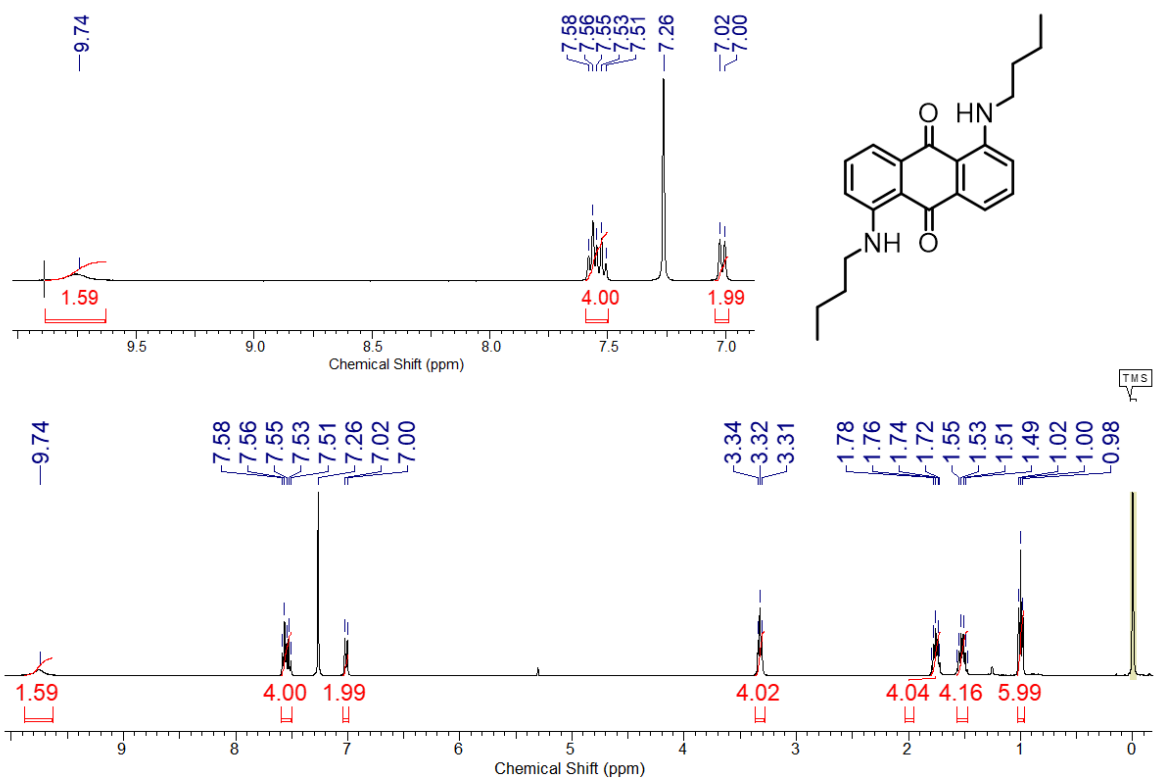

**Figure S9.**  $^1\text{H}$  NMR spectrum of compound AQ-1,5-NH ( $\text{CDCl}_3$ , 400 MHz).

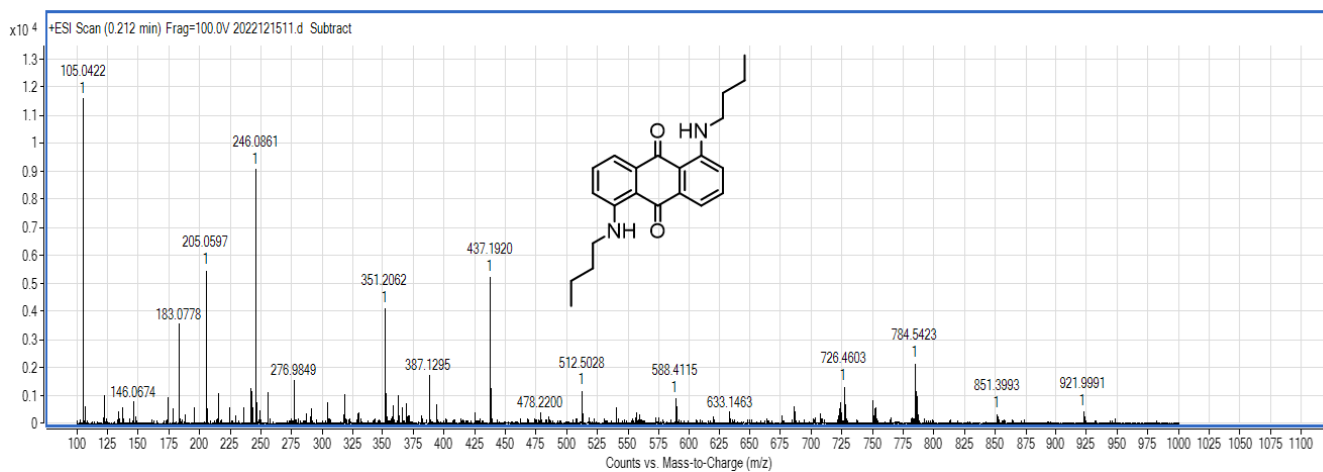

**Figure S10.** HRMS ESI $^+$  of compound AQ-1,5-NH.





## 2. Steady State UV–Vis Absorption and Luminescence Spectra

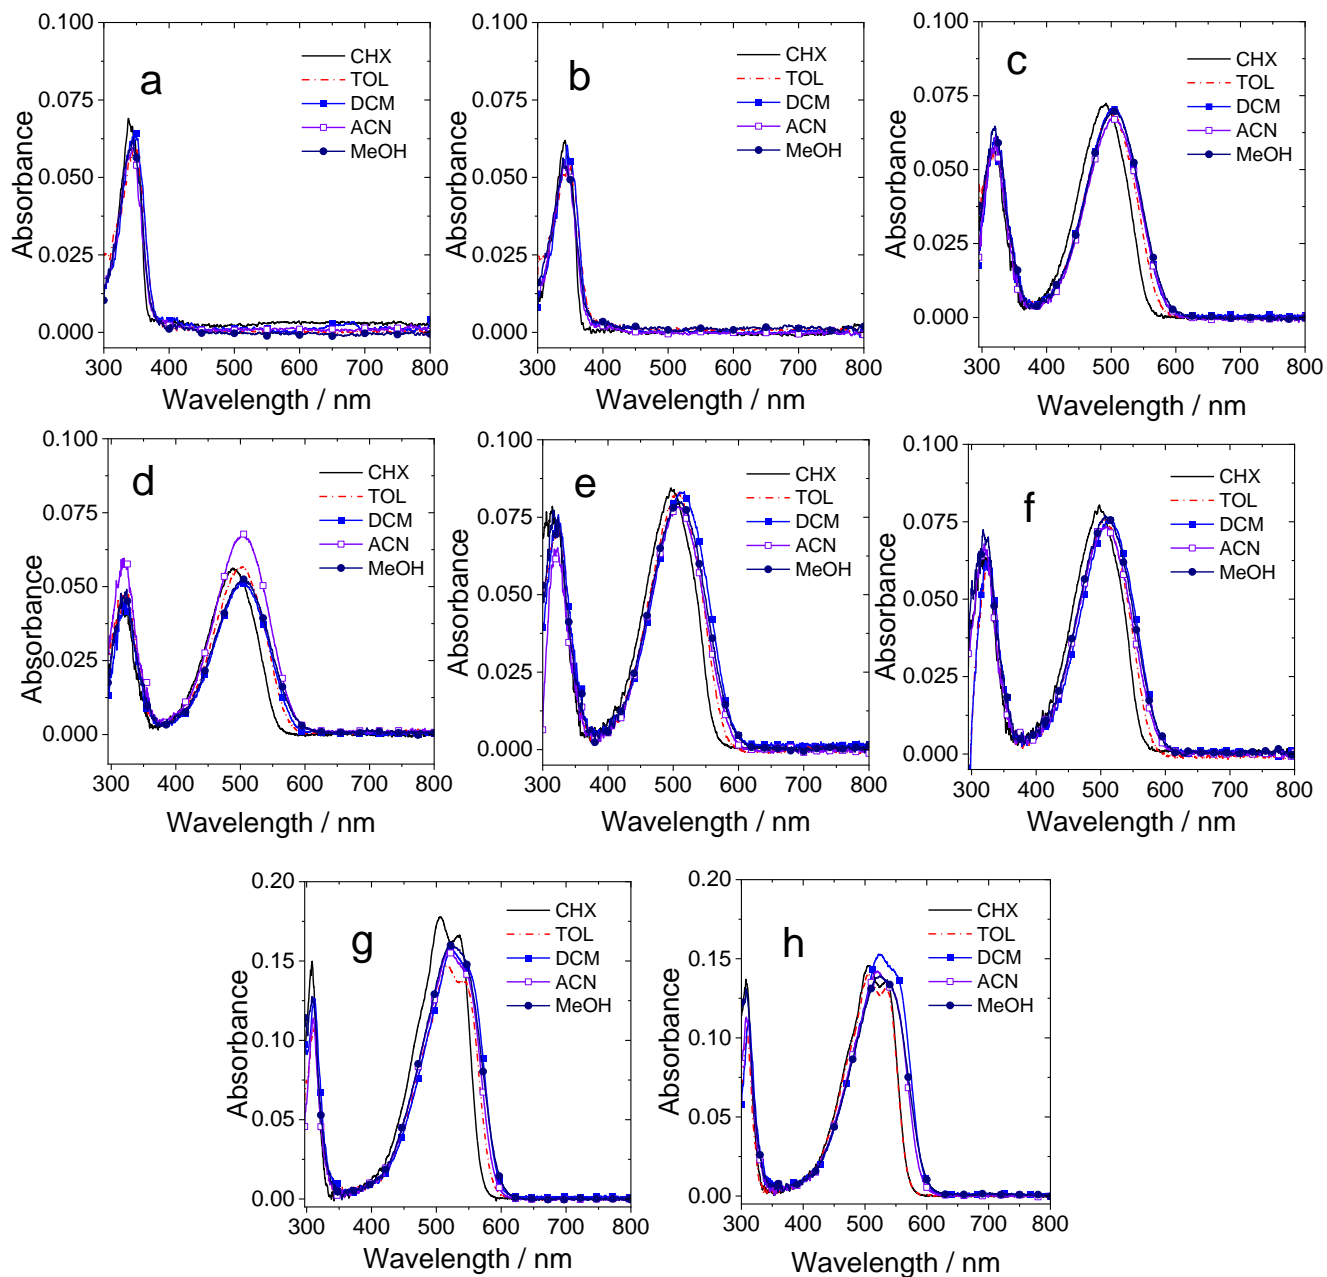

**Figure S13.** UV–vis absorption spectra of (a) AQ-1,5-Cl<sub>2</sub>; (b) AQ-1,8-Cl<sub>2</sub>; (c) AQ-NH-OH-5-Cl; (d) AQ-NH-OH-8-Cl; (e) AQ-NH-5-Cl; (f) AQ-NH-8-Cl; (g) AQ-1,5-NH and (h) AQ-1,8-NH in different solvents.  $c = 1.0 \times 10^{-5}$  M, 20 °C.

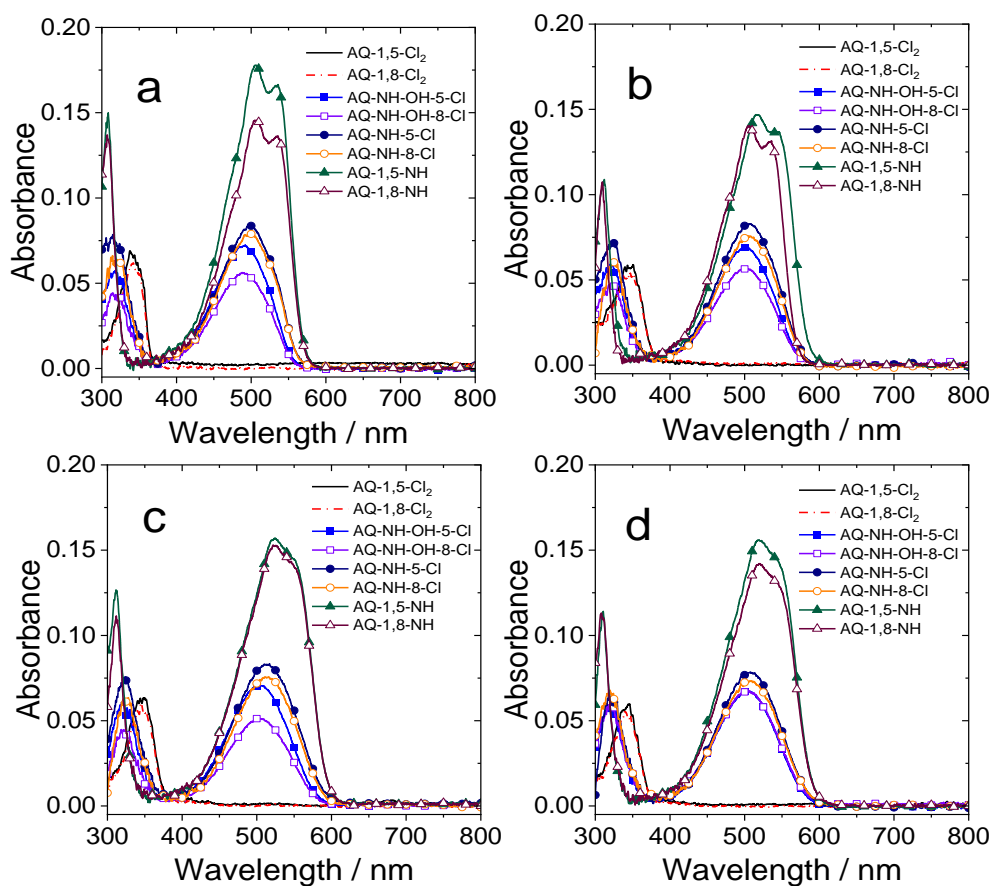

**Figure S14.** UV–vis absorption spectra of **compounds** in (a) cyclohexane (CHX); (b) toluene (TOL); (c) dichloromethane (DCM); (d) acetonitrile (ACN).  $c = 1.0 \times 10^{-5}$  M, 20 °C.

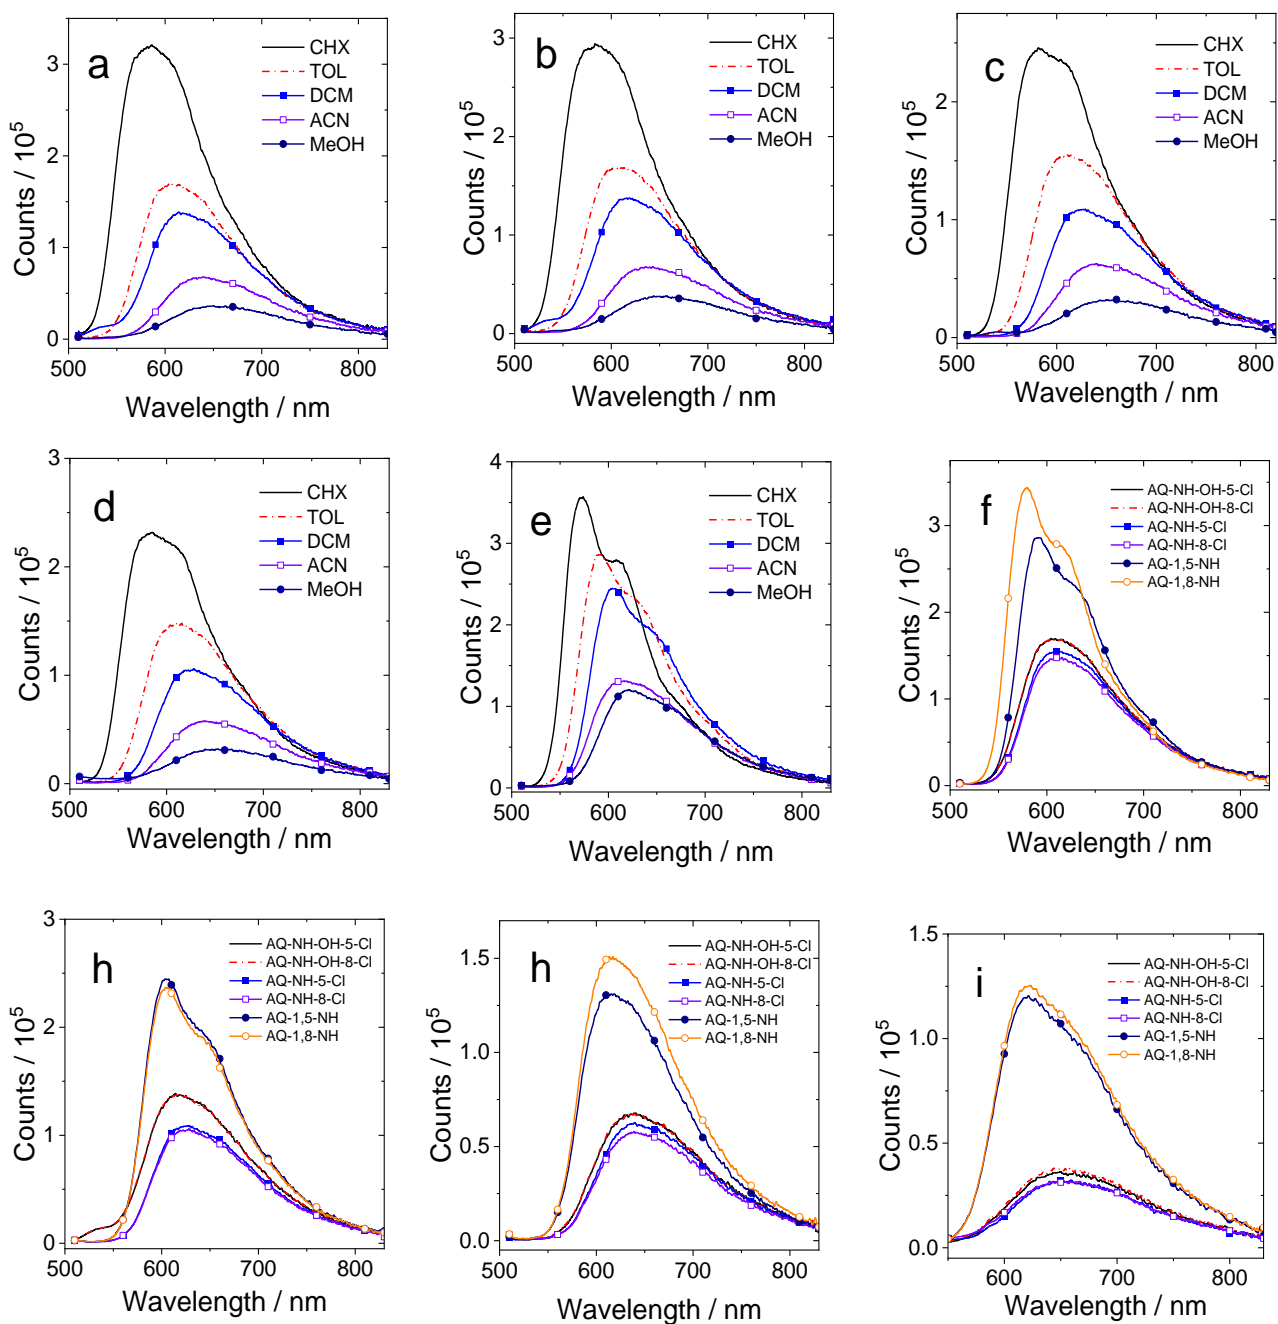

**Figure S15.** Fluorescence emission spectra of (a) **AQ-NH-OH-5-Cl**; (b) **AQ-NH-OH-8-Cl**; (c) **AQ-NH-5-Cl**; (d) **AQ-NH-8-Cl** and (e) **AQ-1,5-NH** in different solvents. Fluorescence emission spectra of compounds in (f) toluene (TOL); (g) dichloromethane (DCM); (h) acetonitrile (ACN); (i) Methanol (MeOH). Optically-matched solutions were used.  $A = 0.1$ ,  $\lambda_{\text{ex}} = 500$  nm,  $20$  °C.

### 3. Photobleaching and photopolymerization

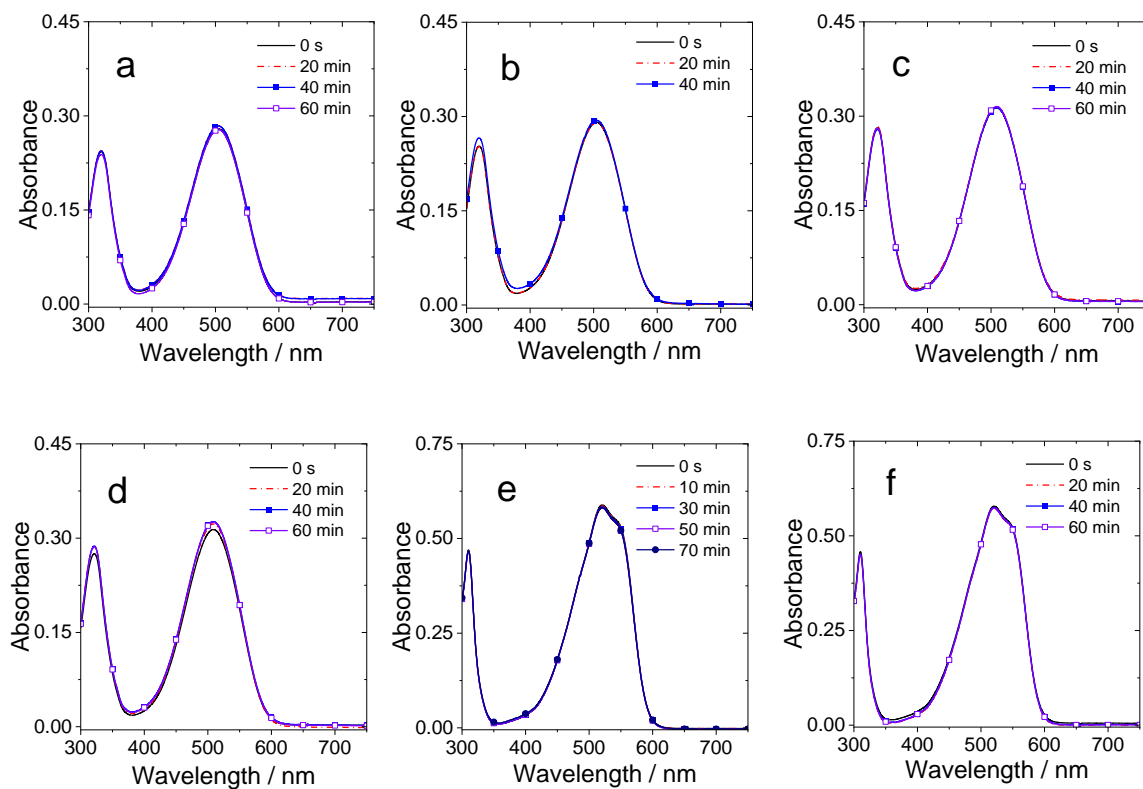

**Figure S16.** Steady state photolysis of (a) **AQ-NH-OH-5-Cl**; (b) **AQ-NH-OH-8-Cl**; (c) **AQ-NH-5-Cl**; (d) **AQ-NH-8-Cl**; (e) **AQ-1,5-NH** and (f) **AQ-1,8-NH** in deaerated acetonitrile upon the xenon lamp exposure;  $c$  [ photosensitizer ] =  $5.0 \times 10^{-5}$  M. UV-vis spectra recorded at different irradiation times. unfiltered white light intensity =  $30 \text{ mW cm}^{-2}$

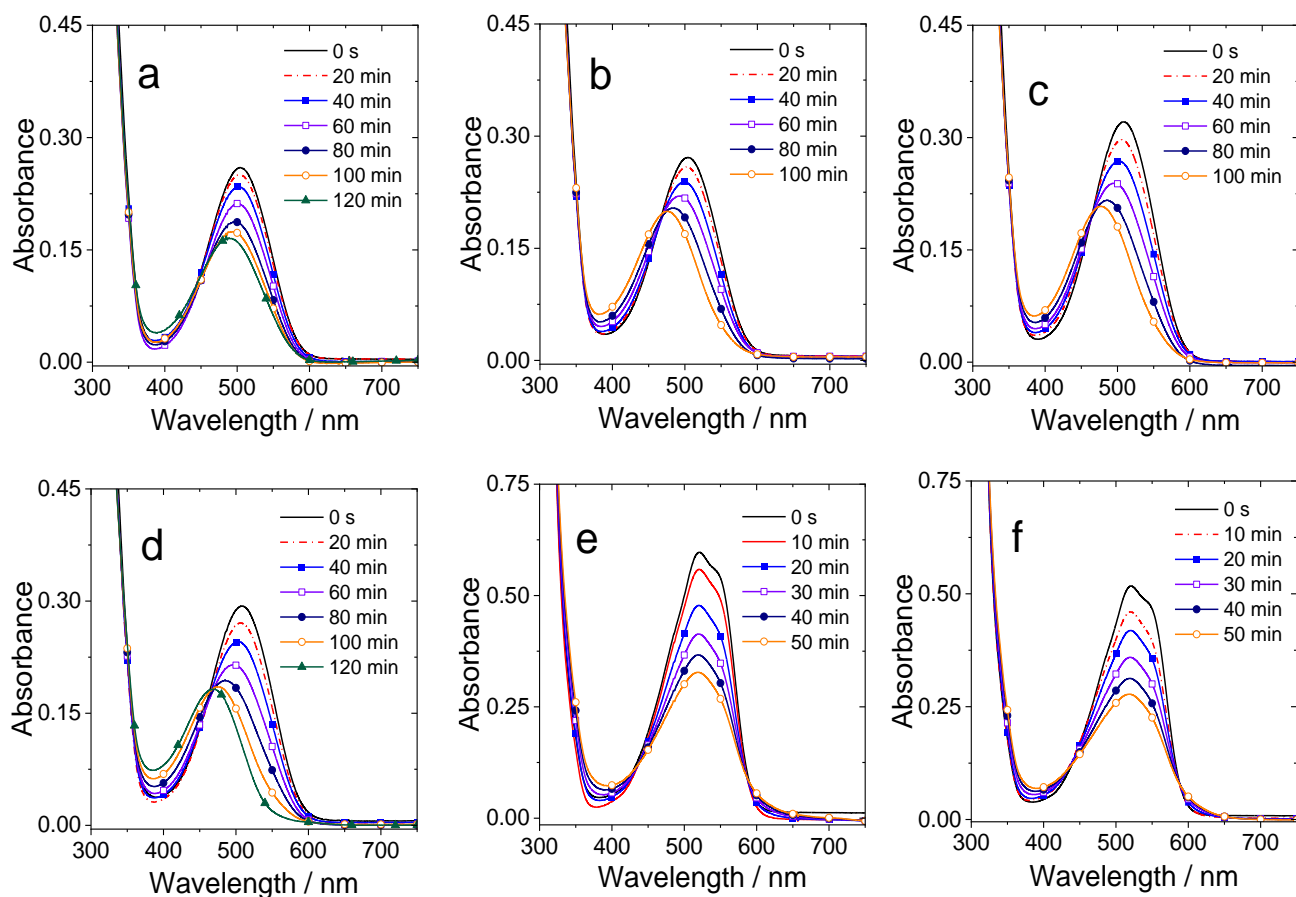

**Figure S17.** Steady state photolysis of (a) **AQ-NH-OH-5-Cl/DPI**; (b) **AQ-NH-OH-8-Cl/DPI**; (c) **AQ-NH-5-Cl/DPI**; (d) **AQ-NH-8-Cl/DPI**; (e) **AQ-1,5-NH/DPI** and (f) **AQ-1,8-NH/DPI** in deaerated acetonitrile upon the xenon lamp exposure;  $c$  [ photosensitizer ] =  $5.0 \times 10^{-5}$  M ,  $c$  [ Iod ] = 30 mM. Uv-vis spectra recorded at different irradiation times. unfiltered white light intensity =  $30 \text{ mW cm}^{-2}$

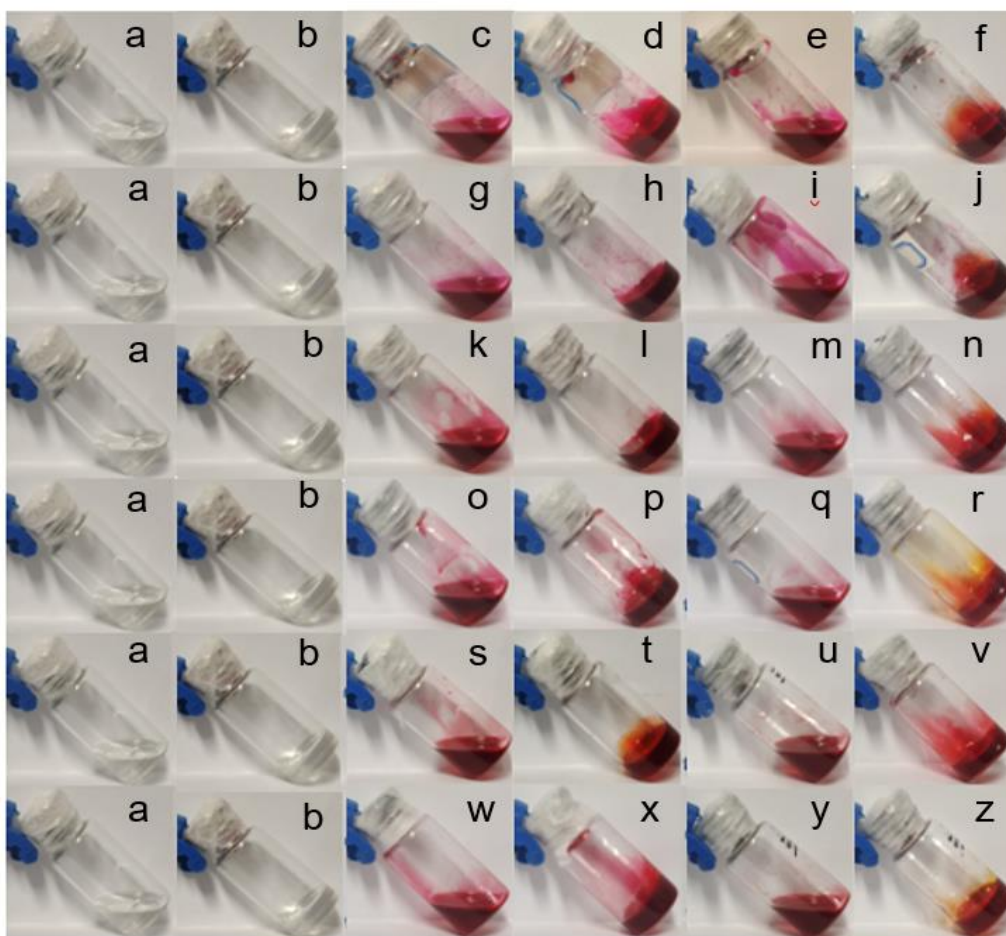

**Figure S18.** The photopolymerization of PETA under  $N_2$  upon exposure to a 35 W Xenon lamp (unfiltered white light intensity =  $200 \text{ mW cm}^{-2}$ ). In the presence of (a) TEA, (c) AQ-1,5-NH, (e) AQ-1,5-NH/TEA, (g) AQ-1,8-NH, (i) AQ-1,8-NH/TEA, (k) AQ-NH-5-Cl, (m) AQ-NH-5-Cl/TEA, (o) AQ-NH-8-Cl, (q) AQ-NH-8-Cl/TEA, (s) AQ-NH-OH-5-Cl, (u) AQ-NH-OH-5-Cl/TEA, (w) AQ-NH-OH-8-Cl and (y) AQ-NH-OH-8-Cl/TEA. The photopolymerization of PETA under  $N_2$  upon exposure to a 35 W Xenon lamp (unfiltered white light intensity =  $200 \text{ mW cm}^{-2}$ ). In the presence of (b) TEA, (d) AQ-1,5-NH, (f) AQ-1,5-NH/TEA, (h) AQ-1,8-NH, (j) AQ-1,8-NH/TEA, (l) AQ-NH-5-Cl, (n) AQ-NH-5-Cl/TEA, (p) AQ-NH-8-Cl, (r) AQ-NH-8-Cl/TEA, (t) AQ-NH-OH-5-Cl, (v) AQ-NH-OH-5-Cl/TEA, (x) AQ-NH-OH-8-Cl and (z) AQ-NH-OH-8-Cl/TEA. (photosensitizer: 0.3 wt%; TEA: 6.2 wt%)

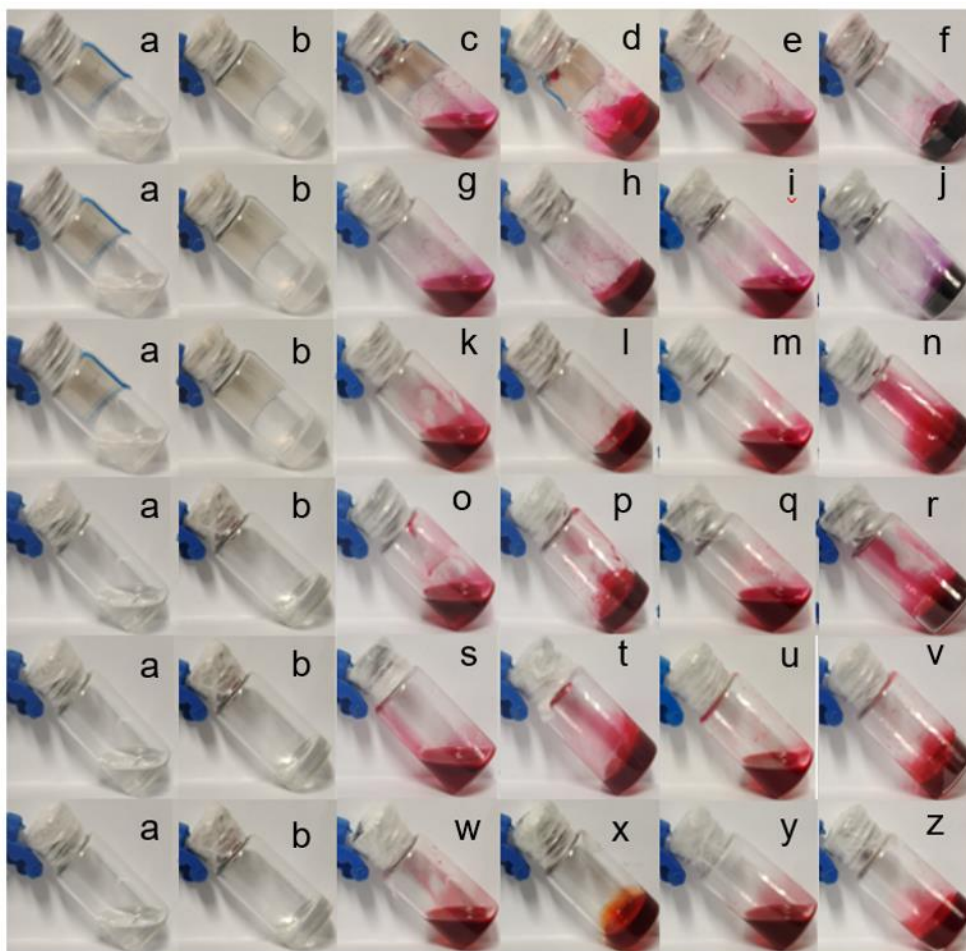

**Figure S19.** The photopolymerization of PETA under  $N_2$  before a 35 W Xenon lamp irradiation (unfiltered white light intensity =  $200 \text{ mW cm}^{-2}$ ). In the presence of (a) **DPI**, (c) **AQ-1,5-NH**, (e) **AQ-1,5-NH/DPI**, (g) **AQ-1,8-NH**, (i) **AQ-1,8-NH/DPI**, (k) **AQ-NH-5-Cl**, (m) **AQ-NH-5-Cl/DPI**, (o) **AQ-NH-8-Cl**, (q) **AQ-NH-8-Cl/DPI**, (s) **AQ-NH-OH-5-Cl**, (u) **AQ-NH-OH-5-Cl/DPI**, (w) **AQ-NH-OH-8-Cl** and (y) **AQ-NH-OH-8-Cl/DPI**. The photopolymerization of PETA under  $N_2$  after a 35 W Xenon lamp irradiation (unfiltered white light intensity =  $200 \text{ mW cm}^{-2}$ ). In the presence of (b) **DPI**, (d) **AQ-1,5-NH**, (f) **AQ-1,5-NH/DPI**, (h) **AQ-1,8-NH**, (j) **AQ-1,8-NH/DPI**, (l) **AQ-NH-5-Cl**, (n) **AQ-NH-5-Cl/DPI**, (p) **AQ-NH-8-Cl**, (r) **AQ-NH-8-Cl/DPI**, (t) **AQ-NH-OH-5-Cl**, (v) **AQ-NH-OH-5-Cl/DPI**, (x) **AQ-NH-OH-8-Cl** and (z) **AQ-NH-OH-8-Cl/DPI**. (photosensitizer: 0.3 wt%; DPI : 6.2 wt%).

**Table S1. The photopolymerization of PETA obtained upon exposure to the Xeon lamp in the presence of anthraquinone derivatives based PISs<sup>a</sup>**

| PISs              | The polymerization time of PETA/min |
|-------------------|-------------------------------------|
| <i>_b</i>         | <i>_c</i>                           |
| DPI               | 7                                   |
| TEA               | 12                                  |
| AQ-1,5-NH         | 8                                   |
| AQ-1,5-NH/DPI     | 1                                   |
| AQ-1,5-NH/TEA     | 5                                   |
| AQ-1,8-NH         | 6                                   |
| AQ-1,8-NH/DPI     | 0.6                                 |
| AQ-1,8-NH/TEA     | 4                                   |
| AQ-NH-5-Cl        | 10                                  |
| AQ-NH-5-Cl/DPI    | 2.8                                 |
| AQ-NH-5-Cl/TEA    | 7                                   |
| AQ-NH-8-Cl        | 10                                  |
| AQ-NH-8-Cl/DPI    | 3.5                                 |
| AQ-NH-8-Cl/TEA    | 5                                   |
| AQ-NH-OH-5-Cl     | 21                                  |
| AQ-NH-OH-5-Cl/DPI | 3.7                                 |
| AQ-NH-OH-5-Cl/TEA | 18                                  |
| AQ-NH-OH-8-Cl     | 30                                  |
| AQ-NH-OH-8-Cl/DPI | 4.7                                 |
| AQ-NH-OH-8-Cl/TEA | 21                                  |

<sup>a</sup> The photopolymerization of PETA under N<sub>2</sub> in the presence of anthraquinone derivatives based PISs (photosensitizer: 0.3 wt%; DPI or TEA: 6.2 wt%) obtained upon exposure to the Xeon lamp, unfiltered white light intensity = 200 mW cm<sup>-2</sup>. <sup>b</sup> In the absence of photosensitizer or coinitiator. <sup>c</sup> Can't polymerization.



#### 4. DFT computation

**Table S2.** Electronic Excitation Energies (eV) and Corresponding Oscillator Strengths (f), Main Configurations, and CI Coefficients of the Low-Lying Electronic Excited States of AQ-1,5-NH in gas phase were Presented. All Parameters were Calculated by B3LYP/6-31G(d). Base on the optimized ground state geometry.

|                  | State          | Energy <sup>a</sup> | <i>f</i> <sup>b</sup> | CI <sup>c</sup> | Composition <sup>d</sup> |
|------------------|----------------|---------------------|-----------------------|-----------------|--------------------------|
| <b>AQ-1,5-NH</b> | S <sub>1</sub> | 2.53 eV/489 nm      | 0.24                  | 0.70            | H→L                      |
|                  | S <sub>7</sub> | 4.25 eV/292 nm      | 0.18                  | 0.69            | H-1→L+1                  |
|                  | S <sub>8</sub> | 4.47 eV/277 nm      | 0.08                  | 0.66            | H-5→L                    |
|                  | T <sub>1</sub> | 1.86 eV/666 nm      | 0.00                  | 0.70            | H→L                      |
|                  | T <sub>2</sub> | 1.87 eV/664 nm      | 0.00                  | 0.70            | H-1→L                    |
|                  | T <sub>3</sub> | 2.71 eV/458 nm      | 0.00                  | 0.69            | H-2→L                    |
|                  | T <sub>4</sub> | 2.91 eV/426 nm      | 0.00                  | 0.55            | H-5→L                    |
|                  | T <sub>5</sub> | 2.94 eV/421 nm      | 0.00                  | 0.57            | H-3→L                    |

<sup>a</sup>Only the selected low lying excited states are presented. <sup>b</sup>Oscillator strengths. <sup>c</sup>CI coefficients are in absolute values. <sup>d</sup>Only the main configurations are presented.

**Table S3.** Electronic Excitation Energies (eV) and Corresponding Oscillator Strengths (f), Main Configurations, and CI Coefficients of the Low-Lying Electronic Excited States of AQ-1,8-NH in gas phase were Presented. All Parameters were Calculated by B3LYP/6-31G(d). Base on the optimized ground state geometry.

|                  | State          | Energy <sup>a</sup> | <i>f</i> <sup>b</sup> | CI <sup>c</sup> | Composition <sup>d</sup> |
|------------------|----------------|---------------------|-----------------------|-----------------|--------------------------|
| <b>AQ-1,8-NH</b> | S <sub>1</sub> | 2.40 eV/517 nm      | 0.21                  | 0.70            | H→L                      |
|                  | S <sub>6</sub> | 4.10 eV/303 nm      | 0.10                  | 0.67            | H→L+1                    |
|                  | S <sub>7</sub> | 4.33 eV/286 nm      | 0.06                  | 0.66            | H-1→L+1                  |
|                  | T <sub>1</sub> | 1.80 eV/691 nm      | 0.00 <sup>g</sup>     | 0.70            | H→L                      |
|                  | T <sub>2</sub> | 1.93 eV/643 nm      | 0.00 <sup>g</sup>     | 0.69            | H-1→L                    |
|                  | T <sub>3</sub> | 2.56 eV/485 nm      | 0.00 <sup>g</sup>     | 0.67            | H-2→L                    |
|                  | T <sub>4</sub> | 2.91 eV/425 nm      | 0.00 <sup>g</sup>     | 0.54            | H-3→L                    |
|                  | T <sub>5</sub> | 2.94 eV/421 nm      | 0.00 <sup>g</sup>     | 0.55            | H-5→L                    |

<sup>a</sup>Only the selected low lying excited states are presented. <sup>b</sup>Oscillator strengths. <sup>c</sup>CI coefficients are in absolute values. <sup>d</sup>Only the main configurations are presented.

**Table S4.** Electronic Excitation Energies (eV) and Corresponding Oscillator Strengths (f), Main Configurations, and CI Coefficients of the Low-Lying Electronic Excited States of AQ-NH-5-Cl in gas phase were Presented. All Parameters were Calculated by B3LYP/6-31G(d). Base on the optimized ground state geometry.

|                   | State          | Energy <sup>a</sup> | <i>f</i> <sup>b</sup> | CI <sup>c</sup> | Composition <sup>d</sup> |
|-------------------|----------------|---------------------|-----------------------|-----------------|--------------------------|
| <b>AQ-NH-5-Cl</b> | S <sub>1</sub> | 2.56 eV/484 nm      | 0.13                  | 0.70            | H→L                      |
|                   | S <sub>4</sub> | 3.63 eV/341 nm      | 0.05                  | 0.68            | H-2→L                    |
|                   | S <sub>6</sub> | 3.86 eV/321 nm      | 0.06                  | 0.53            | H→L+1                    |
|                   | T <sub>1</sub> | 1.80 eV/687 nm      | 0.00 <sup>g</sup>     | 0.70            | H→L                      |
|                   | T <sub>2</sub> | 2.38 eV/520 nm      | 0.00 <sup>g</sup>     | 0.67            | H-1→L                    |
|                   | T <sub>3</sub> | 2.84 eV/437 nm      | 0.00 <sup>g</sup>     | 0.39            | H-3→L                    |
|                   | T <sub>4</sub> | 2.92 eV/425 nm      | 0.00 <sup>g</sup>     | 0.67            | H-4→L                    |
|                   | T <sub>5</sub> | 3.03 eV/409 nm      | 0.00 <sup>g</sup>     | 0.46            | H-2→L                    |

<sup>a</sup>Only the selected low lying excited states are presented. <sup>b</sup>Oscillator strengths. <sup>c</sup>CI coefficients are in absolute values. <sup>d</sup>Only the main configurations are presented.

**Table S5.** Electronic Excitation Energies (eV) and Corresponding Oscillator Strengths (f), Main Configurations, and CI Coefficients of the Low-Lying Electronic Excited States of AQ-NH-8-Cl in gas phase were Presented. All Parameters were Calculated by B3LYP/6-31G(d). Base on the optimized ground state geometry.

|                   | State          | Energy <sup>a</sup> | $f^b$ | CI <sup>c</sup> | Composition <sup>d</sup> |
|-------------------|----------------|---------------------|-------|-----------------|--------------------------|
| <b>AQ-NH-8-Cl</b> | S <sub>1</sub> | 2.52 eV/492 nm      | 0.12  | 0.70            | H→L                      |
|                   | S <sub>4</sub> | 3.64 eV/341 nm      | 0.04  | 0.67            | H-2→L                    |
|                   | S <sub>6</sub> | 3.84 eV/323 nm      | 0.05  | 0.50            | H-4→L                    |
|                   | T <sub>1</sub> | 1.77 eV/700 nm      | 0.00  | 0.70            | H→L                      |
|                   | T <sub>2</sub> | 2.49 eV/497 nm      | 0.00  | 0.66            | H-1→L                    |
|                   | T <sub>3</sub> | 2.77 eV/448 nm      | 0.00  | 0.64            | H-3→L                    |
|                   | T <sub>4</sub> | 2.81 eV/441 nm      | 0.00  | 0.35            | H-4→L                    |
|                   | T <sub>5</sub> | 2.99 eV/414 nm      | 0.00  | 0.41            | H-2→L                    |

<sup>a</sup>Only the selected low lying excited states are presented. <sup>b</sup>Oscillator strengths. <sup>c</sup>CI coefficients are in absolute values. <sup>d</sup>Only the main configurations are presented.

**Table S6.** Electronic Excitation Energies (eV) and Corresponding Oscillator Strengths (f), Main Configurations, and CI Coefficients of the Low-Lying Electronic Excited States of AQ-NH-OH-5-Cl in gas phase were Presented. All Parameters were Calculated by B3LYP/6-31G(d). Base on the optimized ground state geometry.

|                      | State          | Energy <sup>a</sup> | <i>f</i> <sup>b</sup> | CI <sup>c</sup> | Composition <sup>d</sup> |
|----------------------|----------------|---------------------|-----------------------|-----------------|--------------------------|
| <b>AQ-NH-OH-5-Cl</b> | S <sub>1</sub> | 2.56 eV/485 nm      | 0.13                  | 0.70            | H→L                      |
|                      | S <sub>4</sub> | 3.63 eV/341 nm      | 0.05                  | 0.68            | H-2→L                    |
|                      | S <sub>6</sub> | 3.85 eV/322 nm      | 0.06                  | 0.53            | H→L+1                    |
|                      | T <sub>1</sub> | 1.80 eV/689 nm      | 0.00                  | 0.70            | H→L                      |
|                      | T <sub>2</sub> | 2.38 eV/521 nm      | 0.00                  | 0.67            | H-1→L                    |
|                      | T <sub>3</sub> | 2.84 eV/437 nm      | 0.00                  | 0.41            | H-3→L                    |
|                      | T <sub>4</sub> | 2.93 eV/423 nm      | 0.00                  | 0.66            | H-4→L                    |
|                      | T <sub>5</sub> | 3.03 eV/409 nm      | 0.00                  | 0.45            | H-2→L                    |

<sup>a</sup>Only the selected low lying excited states are presented. <sup>b</sup>Oscillator strengths. <sup>c</sup>CI coefficients are in absolute values. <sup>d</sup>Only the main configurations are presented.

**Table S7.** Electronic Excitation Energies (eV) and Corresponding Oscillator Strengths (f), Main Configurations, and CI Coefficients of the Low-Lying Electronic Excited States of AQ-NH-OH-8-Cl in gas phase are Presented. All Parameters were Calculated by B3LYP/6-31G(d). Base on the optimized ground state geometry.

|                      | State          | Energy <sup>a</sup> | <i>f</i> <sup>b</sup> | CI <sup>c</sup> | Composition <sup>d</sup> |
|----------------------|----------------|---------------------|-----------------------|-----------------|--------------------------|
| <b>AQ-NH-OH-8-Cl</b> | S <sub>1</sub> | 2.52 eV/493 nm      | 0.12                  | 0.70            | H→L                      |
|                      | S <sub>4</sub> | 3.64 eV/340 nm      | 0.04                  | 0.66            | H-2→L                    |
|                      | S <sub>6</sub> | 3.83 eV/324 nm      | 0.06                  | 0.51            | H-4→L                    |
|                      | T <sub>1</sub> | 1.76 eV/703 nm      | 0.00                  | 0.70            | H→L                      |
|                      | T <sub>2</sub> | 2.50 eV/496 nm      | 0.00                  | 0.66            | H-1→L                    |
|                      | T <sub>3</sub> | 2.77 eV/447 nm      | 0.00                  | 0.64            | H-3→L                    |
|                      | T <sub>4</sub> | 2.81 eV/442 nm      | 0.00                  | 0.36            | H-4→L                    |
|                      | T <sub>5</sub> | 2.99 eV/414 nm      | 0.00                  | 0.41            | H-2→L                    |

<sup>a</sup>Only the selected low lying excited states are presented. <sup>b</sup>Oscillator strengths. <sup>c</sup>CI coefficients are in absolute values. <sup>d</sup>Only the main configurations are presented.

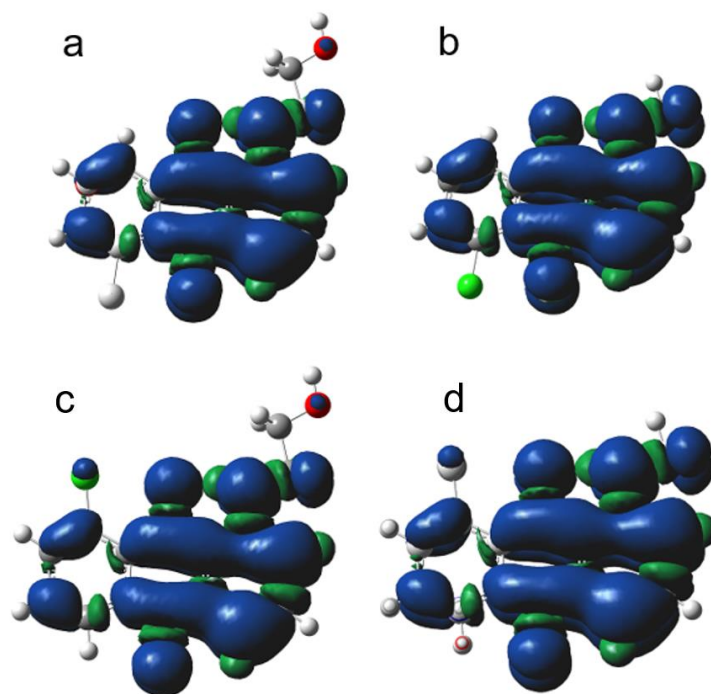

**Figure S20.** Electron spin density surfaces of the triplet state of (a) **AQ-NH-OH-5-Cl**, (b) **AQ-NH-5-Cl**, (c) **AQ-NH-OH-8-Cl** and (d) **AQ-NH-8-Cl** calculated by DFT (B3LYP/6-31G (d)) in vacuum with Gaussian 09. isovalue = 0.0004.
